# Supplementary material for: Patient-centric research in the time of COVID-19: conducting ethical COVID-19 research in Africa
Source: PubMed Central journal article supplement — BMJ Glob Health. 2020 Aug 6;5(8):e003035. doi: 10.1136/bmjgh-2020-003035 (PMC7411326; doi:10.1136/bmjgh-2020-003035), 2020-08-06
Supplement: bmjgh-2020-003035supp001.pdf [file bmjgh-2020-003035supp001.pdf]

**[Study Title, Research Institution/Facility Name]****CONSENT FORM**

Name: \_\_\_\_\_

Study ID Number: \_\_\_\_\_

Date of Birth: \_\_\_\_\_

**What is your family origin?** You can tick more than one box.*[Use local population examples- random South African examples provided]*
 Xhosa   
  Zulu   
  Ndebele   
  Swazi   
  Other

Other: \_\_\_\_\_

1. Do you agree for us to collect this *[blood, genetic, etc]* sample and your health information for **this study** we have described about what affects the symptoms and level of illness in people with COVID-19?

 YES     NO

2. Do you agree for us to collect this *[blood, genetic, etc]* sample and your health information for **other studies in [country name] in the future** about what affects the symptoms and level of illness in people with COVID-19?

 YES     NO

3. Do you agree for us to share your *[blood, genetic, etc]* sample together with your health information for **International studies** being done to better understand COVID-19?

 YES     NO

4. Do you agree for us to use your *[blood, genetic, etc]* sample together with your health information for other studies in the future to study the effect of genes **on other health conditions**?

 YES     NO
\_\_\_\_\_  
**Signature**\_\_\_\_\_  
**Date**\_\_\_\_\_  
*Consent taken by:*\_\_\_\_\_  
*Signature*\_\_\_\_\_  
*Name*
