# Supplementary material for: Patient-centric research in the time of COVID-19: conducting ethical COVID-19 research in Africa
Source: PubMed Central journal article supplement — BMJ Glob Health. 2020 Aug 6;5(8):e003035. doi: 10.1136/bmjgh-2020-003035 (PMC7411326; doi:10.1136/bmjgh-2020-003035), 2020-08-06
Supplement: bmjgh-2020-003035supp002.pdf [file bmjgh-2020-003035supp002.pdf]

**[Study Title, Research Institution/Facility Name]****May we contact you in a few days' time to tell you more about our research study?****Who are we?**

Hello, my name is [interviewer name], and I work at [Institution/Medical Facility]. We do studies and research to try and learn more about the corona virus.

**Why are we talking to you today?**

We understand that right now you may be feeling unwell, or worried about having COVID19, so **we are asking you for permission to contact you in a few days' time when you are feeling better** to tell you more about the research and ask you if you would be willing to be part of it. We will also give you some information about this study to take home with you to read.

For our study, we would need to use some [blood, swabs, samples] that were collected from patients today as part of their normal care, **we are also asking you for permission to store these samples just until you have spoken to us again** and decided if you want to be part of the study.

- The samples will be stored in a [locked freezer] and no-one will use them for anything unless you have agreed to that use.
- If we don't get to speak to you again for any reason, we will destroy the samples after [6 weeks]
- If you tell us you do not wish to be part of the study, we will destroy the samples immediately.

If you have any questions, we can discuss them now, and you are also welcome to call [person] on [number] if there is anything else you would like to know.

-----  
**Your name:** \_\_\_\_\_

**Your phone number/s:** \_\_\_\_\_

**Any other contact details:** \_\_\_\_\_

**Your hospital number:** \_\_\_\_\_

- I agree that you can contact me within the next [4 weeks] to tell me more about your study and invite me to be part of it, and you will keep my samples safely stored until then.

Yes ☐ No ☐

\_\_\_\_\_  
**Signature**

\_\_\_\_\_  
**Date**

\_\_\_\_\_  
*Consent taken by:*

\_\_\_\_\_  
*Signature*

\_\_\_\_\_  
*Name*
